# Supplementary material for: Construction of an NAND logic gate based on molecularly imprinted dual-emission quantum dot composites for the detection of antibiotics
Source: Royal Society of Chemistry journal article supplement (doi:10.1039/c9ay00101h), 2019-01-01
Supplement: c9ay00101h1.pdf [file c9ay00101h1.pdf]

### Supplementary Information for

## Construction of NAND logic gate based on molecularly imprinted dual-emission quantum dots composites for detection of antibiotics

Yimei Ma, Xiaoyong Jin, Yonglei Xing, Gang Ni \* Juan Peng\*

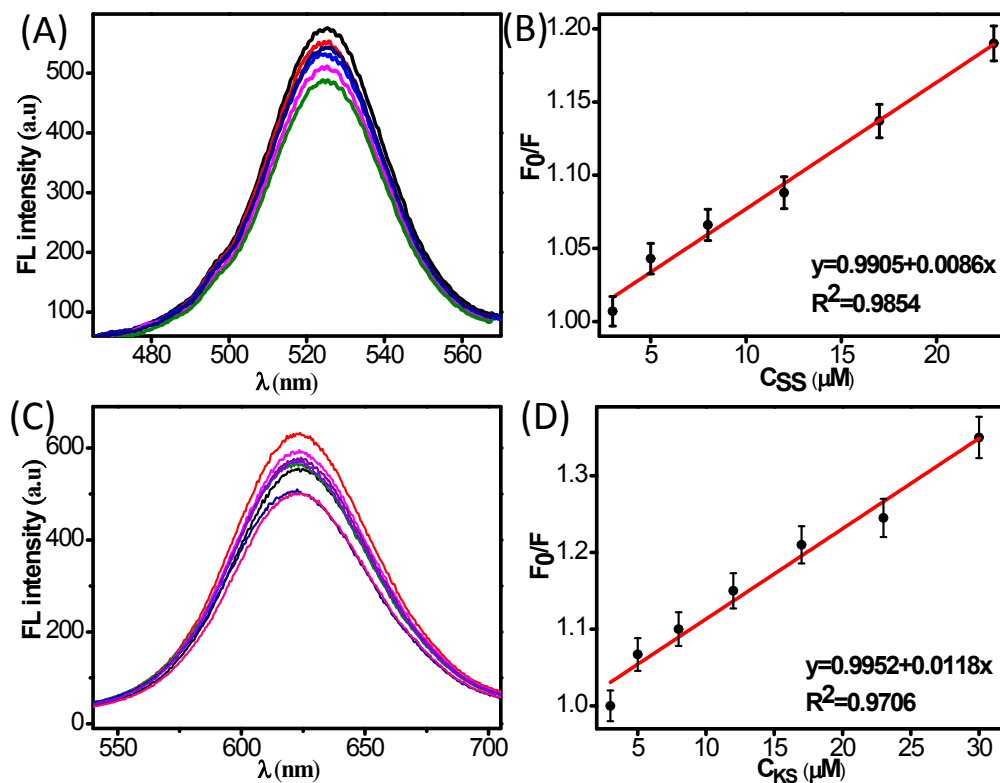

**Fig.S1.** (A) fluorescence spectra ( $\lambda_{ex}=350$  nm and  $\lambda_{em}=525$  nm) of the  $QD_G@NIPs$  with the increasing concentrations of SS. (B) effect of SS concentration on the FL intensity of  $QD_G@NIPs$ . (C) Fluorescence spectra ( $\lambda_{ex}=360$  nm and  $\lambda_{em}=625$  nm) of the  $QD_R@MIPs$  with the increasing concentrations of KS. (D) Effect of KS concentration on the FL intensity of  $QD_R@MIPs$ .

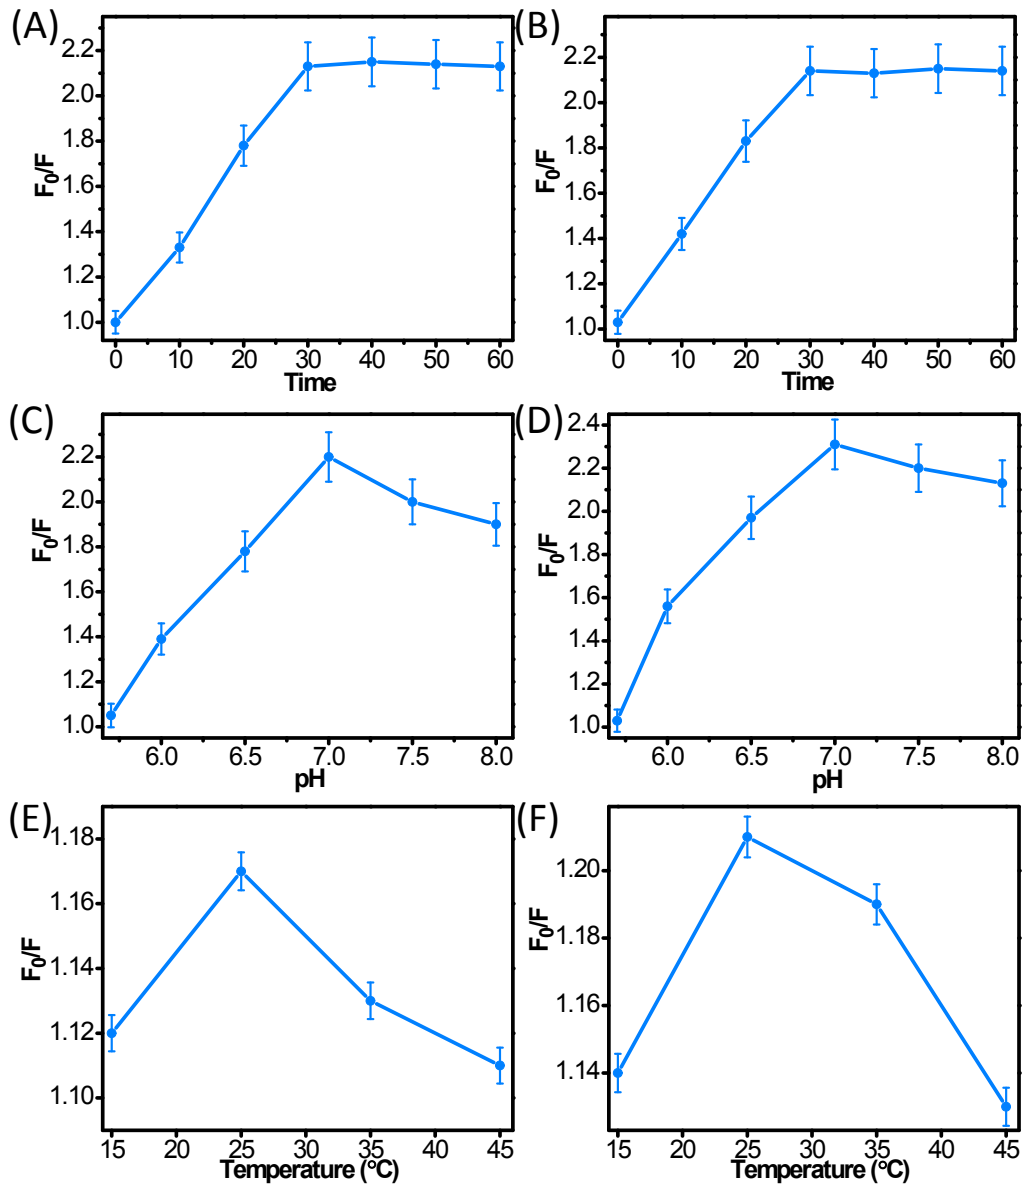

**Fig.S2.** Effect of time on the response of the (A) QD<sub>G</sub>@MIPs to 5 μM SS, and QD<sub>R</sub>@MIPs to 5 μM SK at pH=7.0. Effect of pH on the response of the (C) QD<sub>G</sub>@MIPs to 5 μM SS, and (D) QD<sub>R</sub>@MIPs to 5 μM KS. Effect of temperature on the response of the (E) QD<sub>G</sub>@MIPs to 5 μM SS, and (F) QD<sub>R</sub>@MIPs to 5 μM KS.

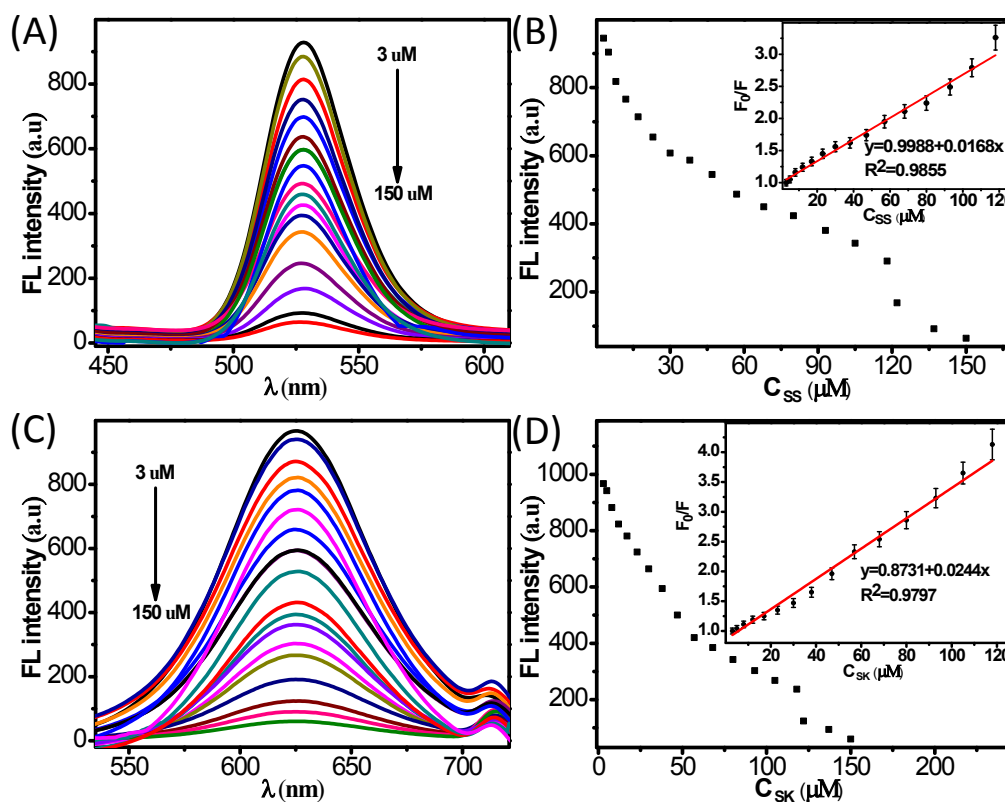

**Fig.S3.** (A) fluorescence spectra ( $\lambda_{ex}=350$  nm and  $\lambda_{em}=525$  nm) of the  $QD_G@MIPs$  with the increasing concentrations of SS. (B) effect of SS concentration on the FL intensity of  $QD_G@MIPs$ , and the inset is the SS concentration calibration curves. (C) Fluorescence spectra ( $\lambda_{ex}=360$  nm and  $\lambda_{em}=620$  nm) of the  $QD_R@MIPs$  with the increasing concentrations of KS. (D) Effect of KS concentration on the FL intensity of  $QD_R@MIPs$ , and the inset is the KS concentration calibration curves.

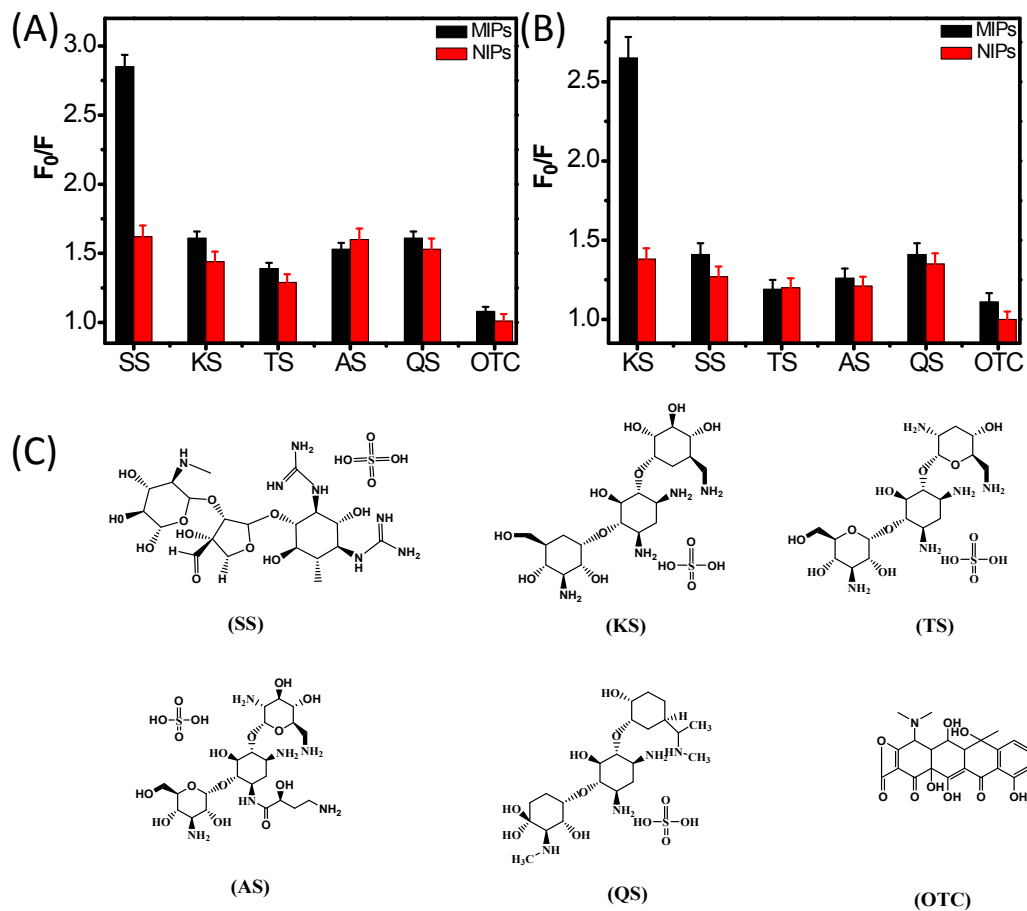

Fig.S4. selectivity of QD<sub>6</sub>@MIPs and QD<sub>6</sub>@NIPs for KS, SS, TS, AS, QS and OTC (A).selectivity of QD<sub>R</sub>@MIPs and QD<sub>R</sub>@NIPs for KS, SS, TS, AS, QS and OTC (B). And chemical Structures of KS, SS, TS, AS, QS and OTC (C).

Table S1 Analytical characteristics of some published methods for determination SS and SK

| Analytes | Detection methods       | Element | Linear range        | LOD            | References |
|----------|-------------------------|---------|---------------------|----------------|------------|
| SS       | Biochemistry            | AuNPs   | 500-22220 $\mu$ M   | 130.0 $\mu$ M  | 1          |
|          | HPLC                    | CAD     | 17.2-34.3 $\mu$ M   | -              | 2          |
|          | HPLC                    | -       | 13.9-55.5 $\mu$ M   | -              | 3          |
|          | Colorimetric            | AuNPs   | 0.1 -0.5 $\mu$ M    | 0.086 $\mu$ M  | 4          |
|          | CdTe@MIPs               | MIP     | 3-150 $\mu$ M       | 0.22 $\mu$ M   | This work  |
| KS       | Electrophoretic         | UV      | 12.0-1733.7 $\mu$ M | 0.5 $\mu$ M    | 5          |
|          | Cantilever array sensor | Aptamer | 100-10000 $\mu$ M   | 50 $\mu$ M     | 6          |
|          | Spectrophotometric      | AuNPs   | 0.001- 0.5 $\mu$ M  | 0.001 $\mu$ M  | 7          |
|          | FPIA                    | IgY     | 0.007- 46.7 $\mu$ M | 0.0017 $\mu$ M | 8          |
|          | CdTe@MIPs               | MIP     | 3-150 $\mu$ M       | 0.24 $\mu$ M   | This work  |

## References

1. J. Singh, P. Khanra, T. Kuila, M. Srivastava, A. K. Das, N. H. Kim, B. J. Jung, D. Y. Kim, S. H. Lee, D. W. Lee, D. G. Kim and J. H. Lee, *Process Biochem*, 2013, 48, 1724-1735.
2. U. Holzgrabe, C. J. Nap, N. Kunz and S. Almeling, *J Pharmaceut Biomed*, 2011, 56, 271-279.
3. J. Zhao, Y. E. Wu, H. Tao, H. Y. Chen, W. P. Yang and S. Y. Qiu, *Rsc Adv*, 2017, 7, 38471-38478.
4. E. Kaale, A. Van Schepdael, E. Roets and J. Hoogmartens, *J Chromatogr A*, 2001, 924, 451-458.
5. X. J. Bai, H. Hou, B. L. Zhang and J. L. Tang, *Biosens Bioelectron*, 2014, 56, 112-116.
6. N. D. Zhou, J. Zhang and Y. P. Tian, *Anal Methods-Uk*, 2014, 6, 1569-1574.
7. C. S. Wang, C. Liu, J. B. Luo, Y. P. Tian and N. D. Zhou, *Anal Chim Acta*, 2016, 936, 75-82.
8. C. Li, Y. Y. Zhang, S. A. Eremin, O. Yakup, G. Yao and X. Y. Zhang, *Food Chem*, 2017, 227, 48-54.
